# Supplementary material
Source: publisher figshare collection journal article supplement (https://sage.figshare.com/ndownloader/files/15352655)
Supplement: Supplementary file 1 [file 15352655]

## Appendix

### Statements and their ranking

|    | Statement                                                                                                                                                  | 1* | 2** | 3*** |
|----|------------------------------------------------------------------------------------------------------------------------------------------------------------|----|-----|------|
| 1  | It is necessary to write down agreements with citizens or citizen representatives.                                                                         | 3  | 1   | 2    |
| 2  | Conflicts with citizens in urban development processes can be prevented by making informal agreements (legally nonbinding).                                | 2  | 3   | -3   |
| 3  | Incorporating citizen interests in urban development is preferably done by making agreements that are legally binding.                                     | 2  | -2  | 0    |
| 4  | There is a need for new legal instruments to organize the involvement of citizens better.                                                                  | -2 | 3   | -1   |
| 5  | Asking citizens to commit to legally binding agreements in urban development projects discourages citizens to get involved.                                | -1 | 1   | 3    |
| 6  | Conflicts in urban development processes emerge because not enough effort is put into finding agreement with citizens.                                     | 4  | 4   | 1    |
| 7  | Enthusiastic citizens should design the decision-making process concerning urban development projects themselves.                                          | 0  | 1   | -1   |
| 8  | Citizens should codesign urban development projects.                                                                                                       | 3  | 2   | 1    |
| 9  | Citizens should have to ability to decide whether an urban development project is a go or a no-go when the urban development project is presented to them. | -3 | -3  | 0    |
| 10 | Involving citizens in urban development projects is only useful through consultation.                                                                      | -3 | -3  | -1   |
| 11 | Citizens need to have the feeling that they are involved but real influence or codesigning responsibilities are unnecessary.                               | -1 | -2  | -3   |
| 12 | The common interest as articulated by the city government is more important than the will of local citizens.                                               | 1  | 0   | -2   |
| 13 | Citizens have sufficient legal and politics tools to influence urban policies; special ways to involve citizens are therefore unnecessary.                 | 0  | -2  | -4   |
| 14 | Involving citizens in urban development leads to much needed democratic innovation.                                                                        | 0  | 2   | 1    |

|    |                                                                                                                                                                   |    |    |    |
|----|-------------------------------------------------------------------------------------------------------------------------------------------------------------------|----|----|----|
| 15 | Involving citizens in urban development makes it easier to solve political problems.                                                                              | 1  | 3  | 0  |
| 16 | The added value of actively involving citizens in urban development is that different population groups meet.                                                     | 1  | 2  | 3  |
| 17 | Actively involving citizens in urban development is an adequate instrument to decrease social spatial inequalities.                                               | -1 | 0  | 2  |
| 18 | If there is an opportunity to participate in an urban development project, only outspoken citizens participate.                                                   | 3  | 0  | 4  |
| 19 | Citizens do not have enough time to participate actively in every urban development project.                                                                      | 0  | 4  | 0  |
| 20 | Citizens are only involved in urban development projects to disguise budget cuts.                                                                                 | -4 | -1 | -1 |
| 21 | The economic development of a city is more important than the wishes of citizens.                                                                                 | 0  | -3 | -2 |
| 22 | It is more important that an urban development project adds to economic development than that it incorporates the interests of citizens.                          | -2 | -4 | -1 |
| 23 | Involving citizens in urban development projects saves money and time.                                                                                            | -2 | 2  | -1 |
| 24 | Involving citizens in urban development is important in order to deliver bottom-up change in municipalities.                                                      | 1  | 2  | 2  |
| 25 | Involving citizens in urban development is necessary as counter power against civil servants and the private sector.                                              | -1 | -2 | 3  |
| 26 | The reason to not give citizens a role in the urban development process is because they do not have the knowledge or expertise to give a meaningful contribution. | -3 | -4 | -2 |
| 27 | Citizens in urban development processes are only focused on their own private interests.                                                                          | 4  | -1 | 1  |
| 28 | Involving citizens in development plans succeeds only through the involvement of NGOs.                                                                            | -2 | -2 | -2 |
| 29 | NGOs do not represent the interest of local citizens in urban development.                                                                                        | -1 | 1  | 0  |
| 30 | The position of citizens is best articulated by NGOs.                                                                                                             | -4 | -1 | -2 |

|    |                                                                                                                                                               |    |    |    |
|----|---------------------------------------------------------------------------------------------------------------------------------------------------------------|----|----|----|
| 31 | NGOs prevent innovative bottom-up initiatives from taking off.                                                                                                | -1 | 0  | 0  |
| 32 | The private sector sees the involvement of citizens in urban development as part of market research.                                                          | 0  | 0  | 0  |
| 33 | The private sector suppresses the possibility of citizens participating in urban development projects because they fear extra costs or a loss of time.        | 2  | -1 | 1  |
| 34 | The government listens more to the private sector than to citizens, which means that attempts to involve citizens often fail.                                 | -2 | 0  | 1  |
| 35 | The private sector listens better to citizens than to the government, because they know what the market wants.                                                | 0  | -1 | -4 |
| 36 | Urban development projects where citizens are involved are successful because the government leads the project.                                               | 2  | 1  | 2  |
| 37 | Civil servants represent everybody's interests in urban development projects.                                                                                 | 2  | -1 | -3 |
| 38 | Civil servants perceive protesting citizens as obstructers who are only focused on their own interests; therefore, they do not take their concerns seriously. | 1  | 0  | 2  |
| 39 | The bureaucracy of the government prevents the involvement of citizens in urban development.                                                                  | 1  | 1  | 4  |

\* Proceduralists

\*\* Citizen Empowerer

\*\*\* Balancer
